# Supplementary material for: A marker of glutathione S-transferase-mediated resistance to insecticides is associated with higher Plasmodium infection in the African malaria vector Anopheles funestus
Source: PubMed Central journal article supplement (PMC6453935; doi:10.1038/s41598-019-42015-1), 2019-04-08
Supplement: 41598_2019_42015_MOESM1_ESM.pdf [file 41598_2019_42015_MOESM1_ESM.pdf]

1 **A glutathione S-transferase metabolic resistance to insecticides is associated**  
2 **with higher *Plasmodium* infection in the African malaria vector *Anopheles***  
3 ***funestus***

4

5

6 **Authors and Affiliations**

7 Magellan Tchouakui<sup>1,2,3</sup>, Mu-Chun Chiang<sup>4</sup>, Cyrille Ndo<sup>1,2,5</sup>, Carine Kegoum  
8 Kuicheu<sup>1,2,3</sup>, Nathalie Amvongo-Adjia<sup>1,3</sup>, Murielle J. Wondji<sup>1,2,4</sup>, Micareme Tchoupo<sup>1,2</sup>,  
9 Jacob Miranda Riveron<sup>1,2,4</sup>, Charles S. Wondji<sup>1,2,4\*</sup>

10

11 <sup>1</sup>Research Unit LSTM/OCEAC P.O. BOX 288, Yaoundé, Cameroon

12

13 <sup>2</sup>Centre for Research in Infectious Diseases (CRID) P.O. BOX 13591, Yaoundé,  
14 Cameroon

15

16 <sup>3</sup>Department of Animal Biology and Physiology, Faculty of Science, University of  
17 Yaoundé 1, P.O. Box 812, Yaoundé, Cameroon

18

19 <sup>4</sup>Department of Vector Biology, Liverpool School of Tropical Medicine, Pembroke  
20 Place, L35QA, Liverpool, UK

21

22 <sup>5</sup>University of Douala, P.O. Box 2701, Douala, Cameroon

23

24 \*corresponding author; email address: [charles.wondji@lstmed.ac.uk](mailto:charles.wondji@lstmed.ac.uk)

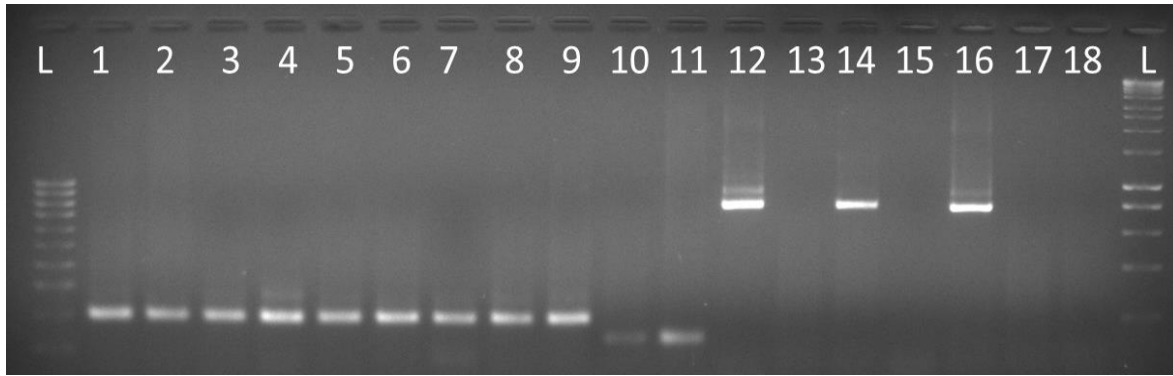

**Figure S1 : Nested PCR on mosquitoes positive by Taqman;** L= ladder 100bp-1kb, 1-9 = *P. falciparum* (205bp); 10-11 = *P. malariae* (144bp); 12, 14, 16 = *P. ovale* (800bp), 13, 15, 17 =No amplification; 18= negative control; L= ladder 0.1-10kb. This gel image was cropped from the original gel.

| HAP     | Freq | 0011111112333334444445<br>77112345938899900333353<br>06594918084501456046746 | Infection<br>status |
|---------|------|------------------------------------------------------------------------------|---------------------|
| H1 (R)  | 1    | TTGAACAAGGTTACGAGTCCATA                                                      | nI                  |
| H2 (R)  | 1    | ...T.....G.....                                                              | nI                  |
| H3 (R)  | 7    | .....G.....                                                                  | nI, I               |
| H4 (R)  | 6    | G..T.....G.....                                                              | nI, I               |
| H5 (S)  | 6    | .....G.....C.                                                                | nI, I               |
| H6 (S)  | 1    | ..C.....G.....CC                                                             | nI                  |
| H7 (S)  | 3    | .....CC                                                                      | nI                  |
| H8 (S)  | 1    | .....G.....C.                                                                | nI                  |
| H9 (S)  | 1    | .....G.....C.                                                                | nI                  |
| H10 (S) | 2    | ..C.....AG.....C.                                                            | nI, I               |
| H11 (S) | 1    | ..C....G....G..G.C...CC                                                      | nI                  |
| H12 (S) | 2    | .....G.T.....CC                                                              | nI                  |
| H13 (S) | 1    | .....G.....TTTCC                                                             | nI                  |
| H14 (S) | 1    | .....C.                                                                      | nI                  |
| H15 (S) | 2    | .....T.....A.....C.                                                          | nI, I               |
| H16 (R) | 1    | .....G.T.....TTT..                                                           | nI                  |
| H17 (R) | 1    | ...T.....G.....                                                              | nI                  |
| H18 (S) | 1    | .....G..TTTC.                                                                | I                   |
| H19 (S) | 2    | .....GA.....G.....C.                                                         | I                   |
| H20 (S) | 1    | .....C.....C.                                                                | I                   |
| H21 (R) | 1    | .A..C.....                                                                   | I                   |
| H22 (R) | 1    | .....T.....TTT.C                                                             | I                   |
| H23 (R) | 1    | G..T.....                                                                    | I                   |
| H24 (S) | 1    | .....GA.....CC                                                               | I                   |
| H25 (S) | 2    | G.C...G...AC.....C.                                                          | I                   |
| H26 (S) | 1    | .....T.....TTTCC                                                             | I                   |
| H27 (S) | 1    | ..C....G.....C.                                                              | I                   |
| H28 (S) | 2    | .....T.....A.....CC                                                          | I                   |

**Figure S2: Polymorphic sites of the GSTe2 gene sequences between infected and non-infected *An. funestus* mosquitoes in Mibellon.** nI is for non-infected; I is for infected. The number in red indicate the nucleotide position of the substitution site. Each line represents an haplotype (H) whereas R or S stand for resistant or susceptible haplotype.

**Table S1:** Assessment of association between different genotypes for RDL mutation on infection by *Plasmodium spp.* in *Anopheles funestus* s.s in Mibellon as RDL is nearly fixed in Obout for whole mosquitoes.

| Génotypes | Rdl                   |         |
|-----------|-----------------------|---------|
|           | Odds ratio            | P-value |
| RR vs RS  | 0,10<br>(0,10 – 1,19) | 0,08    |
| RR vs SS  | 0,38<br>(0,04 – 3,77) | 0,37    |
| RS vs SS  | 4<br>(1,24 – 12,86)   | 0,03*   |

**Abbreviations:** RR, homozygous resistant; RS, heterozygous; SS, homozygous susceptible; for odds ratio, confidence interval at 95% are given in brackets; \*,significant.

**Table S2:** Assessment of association between different genotypes for RDL combined with GSTe2 mutations on infection by *Plasmodium spp.* in *Anopheles funestus* s.s.

| Genotypes      | <i>Oocyst infection</i> |         | <i>Sporozoite infection</i> |         |
|----------------|-------------------------|---------|-----------------------------|---------|
|                | Odds ratio              | P-value | Odds ratio                  | P-value |
| RR/RR vs RS/RR | 1.69<br>(0.7 – 2.19)    | 0.318   | 2.42<br>(0.76 – 2.8)        | 0.29    |
| RR/RR vs SS/RR | 2.7<br>(0.8-3.9)        | 0.16    | Inf<br>(inf)                | <0.0001 |
| RS/RR vs SS/RR | 1.59<br>(0.58 – 3.1)    | 0.36    | Inf<br>(inf)                | 0.003   |

**Table S3:** genetic diversity parameters of *GSTe2* sequences according to the infection status and the L119F genotypes

| Samples                      | N  | S  | h (Hd)    | Syn | NSyn | $\pi$ (k)    | D                    | F*                   |
|------------------------------|----|----|-----------|-----|------|--------------|----------------------|----------------------|
| <i>P. falciparum</i>         |    |    |           |     |      |              |                      |                      |
| Infected                     | 22 | 20 | 16 (0,97) | 4   | 7    | 0,006 (4,90) | - 0,39 <sup>ns</sup> | 0,26 <sup>ns</sup>   |
| uninfected                   | 30 | 17 | 17 (0,94) | 4   | 5    | 0,005 (3,64) | - 0,52 <sup>ns</sup> | - 0,35 <sup>ns</sup> |
| GSTe2                        |    |    |           |     |      |              |                      |                      |
| Resistant (RR)               | 14 | 11 | 8 (0,87)  | 3   | 3    | 0,004 (3,03) | - 0,49 <sup>ns</sup> | - 0,56 <sup>ns</sup> |
| Heterozygote (RS)            | 12 | 13 | 7 (0,89)  | 3   | 5    | 0,004 (3,30) | - 0,99 <sup>ns</sup> | - 1,17 <sup>ns</sup> |
| Susceptible (SS)             | 26 | 19 | 19 (0,97) | 5   | 3    | 0,005 (3,98) | - 0,71 <sup>ns</sup> | - 0,71 <sup>ns</sup> |
| GSTe2 × <i>P. falciparum</i> |    |    |           |     |      |              |                      |                      |
| RR × <i>P. fal</i> +         | 2  | 7  | 2 (1)     | 2   | 2    | 0,009 (7)    | //                   | //                   |
| RR × <i>P. fal</i> -         | 12 | 9  | 6 (0,82)  | 2   | 2    | 0,003 (2,44) | - 0,74 <sup>ns</sup> | - 1,22 <sup>ns</sup> |
| RS × <i>P. fal</i> +         | 8  | 13 | 7 (0,96)  | 3   | 5    | 0,005 (4,21) | - 0,81 <sup>ns</sup> | - 0,96 <sup>ns</sup> |
| RS × <i>P. fal</i> -         | 4  | 3  | 3 (0,83)  | 1   | 2    | 0,002 (1,67) | 0,17 <sup>ns</sup>   | 0,15 <sup>ns</sup>   |
| SS × <i>P. fal</i> +         | 12 | 15 | 9 (0,96)  | 4   | 3    | 0,006 (4,73) | - 0,21 <sup>ns</sup> | 0,27 <sup>ns</sup>   |
| SS × <i>P. fal</i> -         | 14 | 14 | 11 (0,96) | 3   | 3    | 0,004 (3,37) | - 0,95 <sup>ns</sup> | - 1,41 <sup>ns</sup> |
| Total                        | 52 | 23 | 28 (0,96) | 5   | 7    | 0,005 (4,19) | - 0,57 <sup>ns</sup> | 0,07 <sup>ns</sup>   |

N : number of sequences analysed ; (2n) ; S : number of polymorphic sites; h : number of haplotypes (dh : haplotypic diversity) ; Syn : number of synonymous mutations ; NSyn : number of non-synonymous mutations;  $\pi$ : nucléotidique diversity (k : mean number of nucléotidic differences between sequences) ; D: Tajima index ; F\* : Fu & Li index. ; ns : no significant

**Table S4:** Details of primer sequences used to analyse for *L119F GSTe2* mutation.

| Primers      | Sequence (5' to 3')                    |
|--------------|----------------------------------------|
| NdeI_Gste2F  | GGAATTCCATATGACCAAGCTAGTTCTGTACACGCT   |
| XbaI_Gste2 R | TCTACATCAAGCTTTAGCATTTCCTCCTT          |
| L119F-Res    | CGGGAATGTCCGATTTTCCGTAGAA <b>tAA</b>   |
| L119-F-Sus   | CATTCTTATTCTCATTACAGGAGCGTA <b>aTC</b> |
